# Supplementary material for: Modulation of macrophage polarization and lung cancer cell stemness by MUC1 and development of a related small-molecule inhibitor pterostilbene
Source: PubMed Central journal article supplement (PMC5129938; doi:10.18632/oncotarget.8101), 2016-06-04
Supplement: oncotarget-07-39363-s001.pdf [file oncotarget-07-39363-s001.pdf]

# Modulation of macrophage polarization and lung cancer cell stemness by MUC1 and development of a related small-molecule inhibitor pterostilbene

## Supplementary Material

**A**

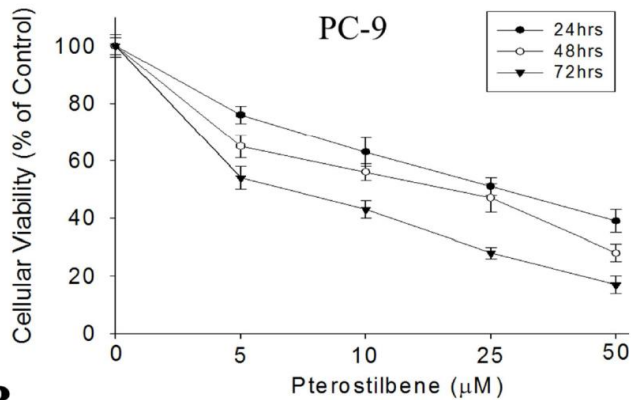

**B**

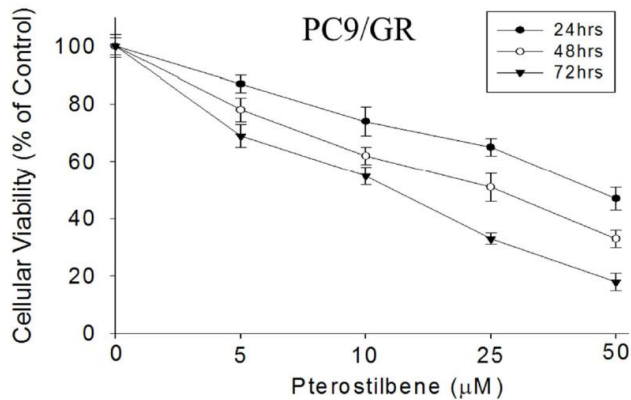

**Supplemental Figure S1.** MTT assays were used to examine the inhibitory activities of pterostilbene on lung cancer cell proliferation. The cells were exposed to various concentrations of pterostilbene in PC-9 (EGFR exon 19 in-frame deletion) and PC-9/GR (gefitinib-acquired resistant cells) cells for 72 h. Each data point is the result of more than three independent experiments.

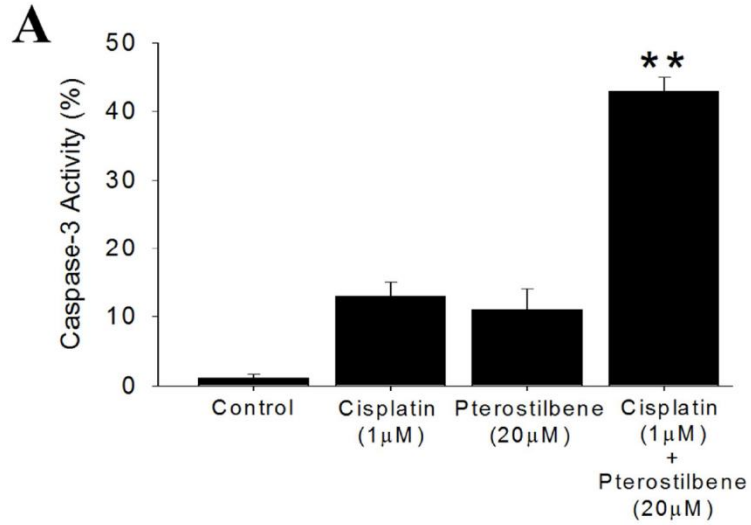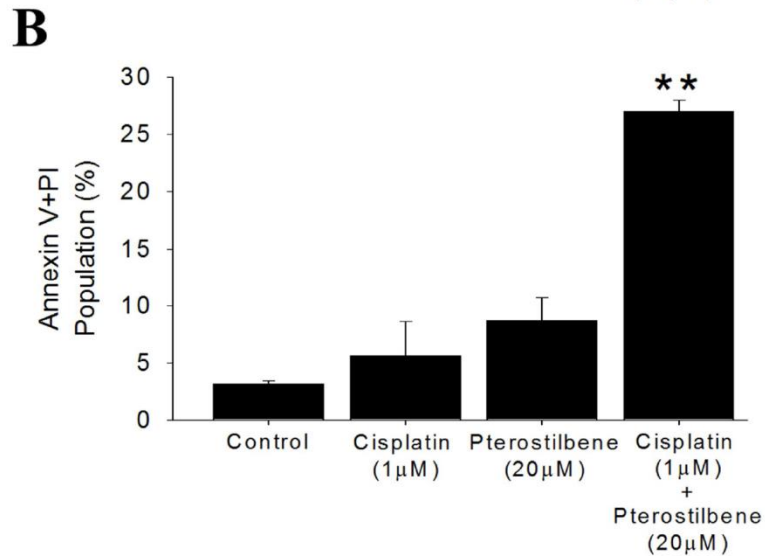

**Supplementary Figure S2.** Synergistic apoptosis analysis of the combination treatment. Both Caspase-3 activity (A) and Annexin V-PI conjugates for apoptosis (B) were measured in H441 cells treated with DMSO as the vehicle control, cisplatin (1µM), pterostilbene (20 µM), and the combination. \* P < 0.05 when compared to the control (DMSO).
